# Supplementary material for: Reconciling energy efficiency and energy intensity metrics: an integrated decomposition analysis
Source: Springer Nature journal article supplement (doi:10.1007/s12053-018-9667-z), 2018-05-08
Supplement: MOESM1 [file 15747634]

## Sheet: Introduction
A Guide to Supplemental Materials for
Reconciling Energy Efficiency and Energy Intensity Metrics: An Integrated Decomposition Analysis
Journal of Energy Efficiency
Ralph D. Torrie, Christopher Stone, and David B. Layzell
Correspondence to: Ralph D. Torrie, Torrie Smith Associates, 125 Perry Street, Cobourg, ON Canada K9A 1N8, rtorrie@torriesmith.com.
2018-04-15
This tab provides a guide to this Microsoft Excel file that was built and used to carry out the decomposition of total energy intensity for the Canadian economy between 1995 and 2010 and the individual sector intensity anlayses that are desdribed in the above referenced paper. Information is provided to the reader to extract the data for each of the figures presented in the manuscript. The presen…
Link to Figure tab	Caption from paper
Fig 1 Data	Figure 1 A. Changes in Kaya factors for energy-based GHG emissions in Canada, 1981-2015, where CO2e [Mg] = Population [capita] X GDP/Population [$/capita] X Energy use/GDP [GJ/$] X GHG/ Energy use [MgCO2e/GJ]. B. Primary energy intensity (MJ/2002$) of Canadian economy, 1981-2015.
Fig 2 Data	Figure 2 Decomposition of the observed change in Canada’s Energy/GDP ratio between 1995 and 2010 (A), showing the contribution of a net change in business and household energy intensity (B) which was subsequently decomposed into sector contributions (C). Adapted from Torrie et al. (2016).
Fig 3 Data	Figure 3 Decomposition of the impact of the oil and gas (OG) sector on the Δ(E/GDP) of the Canadian economy between 1995 and 2010. Charts A to D represent the sequential decomposition of the total impact of the OG sector presented in Figure 2C. See Table 1 for equations.
Fig 4 Data	Figure 4 Decomposition of the impact of the power generation (PG) sector on the Δ(E/GDP) of the Canadian economy between 1995 and 2010. Charts A and B represent the sequential decomposition of the total impact of PG sector presented in Figure 2C. See Table 1 for equations.
Fig 5 Data	Figure 5 Decomposition of the impact of the Energy Intensive Industry (EII) sector on the Δ(E/GDP) of the Canadian economy between 1995 and 2010. Charts A and B represent the sequential decomposition of the total impact of EII sector presented in Figure 2C. See Table 1 for equations.
Fig 6 Data	Figure 6 Decomposition of the impact of the Commercial and Institutional (CI) sector on the Δ(E/GDP) of the Canadian economy between 1995 and 2010. Charts A and B represent the sequential decomposition of the total impact of CI sector presented in Figure 2C. See Table 1 for equations.
Fig 7 Data	Figure 7 Decomposition of the impact of the Freight Transport (FT) sector on the Δ(E/GDP) of the Canadian economy between 1995 and 2010. Charts A and B represent the sequential decomposition of the total impact of the FT sector presented in Figure 2C. See Table 1 for equations.
Fig 8 and 9 Data	Figure 8 Decomposition of the impact of the Residential (Res) sector on the Δ(E/GDP) of the Canadian economy between 1995 and 2010. Charts A and B represent the sequential decomposition of the total impact of the Res sector presented in Figure 2C. See Table 1 for equations.
Fig 8 and 9 Data	Figure 9 Decomposition of the impact of the Personal Transport (PT) sector on the Δ(E/GDP) of the Canadian economy between 1995 and 2010. Charts A and B represent the sequential decomposition of the total impact of the PT sector presented in Figure 2C. See Table 1 for equations.
Fig 10 and 11 Data	Figure 10 A compilation of the most highly deconstructed factors from Figures 3 to 9, arranged to show their impact (positive to negative) on the total ∆(E/GDP) of the Canadian economy. Factors have been classified into physical energy intensity impacts (red bars), ‘intra-sector structural factors (blue bars), and unclassified (grey bars). See text for details.
Fig 10 and 11 Data	Figure 11 Structural vs. sector energy intensity impacts on total ∆(E/GDP) of the Canadian economy between 1995-2010 (A). The sector energy intensity impacts from Figure 10 were separated into intra-structural impacts, energy efficiency impacts and not decomposed (B). When the intra-structural impacts were added to the other structural impacts, the total ∆(E/GDP) of the Canadian Economy was decom…
NOTE re all results	Column 'I' in the Summary Results tab provides the results for the first order decomposition anlaylsis. The data in column 'I' are for the period defined by the start dates and end dates set in tab <<FGDPPERCAP>>, cells AF23 and AG23. The data for the 1995 to 2010 period were conserved in column J of the <<Summary Results>> tab. Data for other periods used in the calculation of variance can be fo…

## Sheet: Fig 1 Data
ENERGY	1981	1982	1983	1984	1985	1986	1987	1988	1989	1990	1991	1992	1993	1994	1995	1996	1997	1998	1999	2000	2001	2002	2003	2004	2005	2006	2007	2008	2009	2010	2011	2012	2013	2014	2015
Energy in PJ	7488.57	7346.86	7103.95	7575.42	7837.21	8000.02	8148.34	8667.28	8951.91	8691.78	8649.25	8820.87	9054.75	9456.76	9462.37	9568.58	9742.94	9696.77	9918.45	10236.5	10148.1	10447.7	10817.8	10826.1	10789.4	10952.1	11168.2	11073.6	10561.8	10590.9
Recent from CANSIM															9135935859000	9303725008000	9479230889000	9518074407000	9747474780000	10108691916000	10025057228000	10362598444000	10625621954000	10585241124000	10537775990000	10439059091000	10862964027000	10675015644000	10230033352000	10442723312000	10651941774000	10681750805000	10923230514000	11096366246000	11087465978000
Energy for new paper	7488.57	7346.86	7103.95	7575.42	7837.21	8000.02	8148.34	8667.28	8951.91	8691.78	8649.25	8820.87	9054.75	9456.76	9462.37	9568.58	9742.94	9696.77	9918.45	10236.5	10148.1	10447.7	10817.8	10826.1	10789.4	10952.1	11168.2	11073.6	10561.8	10590.9	10651.9	10681.8	10923.2	11096.4	11087.5
POPULATION	1981	1982	1983	1984	1985	1986	1987	1988	1989	1990	1991	1992	1993	1994	1995	1996	1997	1998	1999	2000	2001	2002	2003	2004	2005	2006	2007	2008	2009	2010	2011	2012	2013	2014	2015
Population from Suppl Material	24819916	25116942	25366452	25607052	25842116	26100278	26446600	26791748	27276780	27691138	27976542	28308964	28621384	28935678	29235900	29542808	29838440	30087998	30333828	30617752	30950042	31283172	31567788	31867520	32171482	32502076	32854916	33243788	33653812	34049520
CANSIM 051-0001 update	24819915	25116942	25366451	25607053	25842116	26100278	26446601	26791747	27276781	27691138	28037420	28371264	28684764	29000663	29302311	29610218	29905948	30155173	30401286	30685730	31020596	31358418	31641630	31938004	32242364	32570505	32887928	33245773	33628571	34005274	34342780	34750545	35152370	35535348	35832513
Population for new paper	24819915	25116942	25366451	25607053	25842116	26100278	26446601	26791747	27276781	27691138	28037420	28371264	28684764	29000663	29302311	29610218	29905948	30155173	30401286	30685730	31020596	31358418	31641630	31938004	32242364	32570505	32887928	33245773	33628571	34005274	34342780	34750545	35152370	35535348	35832513
GROSS DOMESTIC PRODUCT	1981	1982	1983	1984	1985	1986	1987	1988	1989	1990	1991	1992	1993	1994	1995	1996	1997	1998	1999	2000	2001	2002	2003	2004	2005	2006	2007	2008	2009	2010	2011	2012	2013	2014	2015
GDP from Suppl Materials	613732830720	600340918016	6.14646e+11	644977754368	6.75958e+11	6.94821e+11	7.19302e+11	749351083008	7.6618e+11	7.71449e+11	7.61249e+11	7.66929e+11	7.86581e+11	8.21926e+11	8.42646e+11	8.53657e+11	8.87638e+11	921349580288	9.717e+11	1.0214e+12	1.03895e+12	1.06641e+12	1.08851e+12	1.12381e+12	1.159e+12	1.1914e+12	1.21872e+12	1228139915008	1.18977e+12	1.23283e+12
Updated GDP															842646	853657	887638	921350	971700	1.0214e+06	1.03895e+06	1.06641e+06	1.08851e+06	1.12381e+06	1.159e+06	1.1914e+06	1.21872e+06	1.22814e+06	1.18977e+06	1.23283e+06	1.27272e+06	1.2965e+06	1.32898e+06	1.36723e+06	1.37945e+06
GDP for new paper	613732830720	600340918016	6.14646e+11	644977754368	6.75958e+11	6.94821e+11	7.19302e+11	749351083008	7.6618e+11	7.71449e+11	7.61249e+11	7.66929e+11	7.86581e+11	8.21926e+11	8.42646e+11	8.53657e+11	8.87638e+11	921349580288	9.717e+11	1.0214e+12	1.03895e+12	1.06641e+12	1.08851e+12	1.12381e+12	1.159e+12	1.1914e+12	1.21872e+12	1228139915008	1.18977e+12	1.23283e+12	1.27272e+12	1.2965e+12	1.32898e+12	1.36723e+12	1.37945e+12
ENERGY RELATED EMISSIONS	1981	1982	1983	1984	1985	1986	1987	1988	1989	1990	1991	1992	1993	1994	1995	1996	1997	1998	1999	2000	2001	2002	2003	2004	2005	2006	2007	2008	2009	2010	2011	2012	2013	2014	2015
Emissions from Supplemental Material	442.297	432.144	410.71	436.951	440.92	438.073	449.136	480.85	503.601	482.06	474.843	493.211	495.798	513.182	523.406	533.019	555.925	565.675	575.538	599.139	594.118	602.862	624.661	612.532	609.41	611.464	624.856	607.782	574.573	577.278
Updated emissions from Env Canada																															575000	578000	592000	594000	587000
Emissions for new paper	442.297	432.144	410.71	436.951	440.92	438.073	449.136	480.85	503.601	482.06	474.843	493.211	495.798	513.182	523.406	533.019	555.925	565.675	575.538	599.139	594.118	602.862	624.661	612.532	609.41	611.464	624.856	607.782	574.573	577.278	575	578	592	594	587
E/GDP	12.2017	12.2378	11.5578	11.7452	11.5942	11.5138	11.3281	11.5664	11.6838	11.2668	11.3619	11.5016	11.5115	11.5056	11.2294	11.2089	10.9763	10.5245	10.2073	10.022	9.76762	9.79704	9.93815	9.63339	9.3092	9.19259	9.16387	9.01655	8.8772	8.59075	8.36941	8.23893	8.21928	8.11592	8.03761
Emissions/energy	59.0629	58.8202	57.8143	57.6802	56.2597	54.759	55.12	55.4787	56.2562	55.4616	54.9	55.9141	54.7555	54.2661	55.3144	55.7051	57.0592	58.3364	58.027	58.5297	58.545	57.7029	57.7438	56.5792	56.4823	55.8308	55.9496	54.8858	54.4009	54.5069	53.9808	54.111	54.1964	53.531	52.9427
GDP/capita	24727.4	23901.8	24230.6	25187.5	26157.2	26621.2	27198.3	27969.5	28089.1	27859	27151.2	27031.9	27421.6	28341.6	28757	28829.8	29681	30553.6	31962.5	33285.8	33492.2	34007.2	34401.3	35187.2	35946.6	36579.2	37056.7	36941.2	35379.7	36254	37059.4	37308.7	37806.2	38475.3	38497.1
Kaya normalized to 1981	1981	1982	1983	1984	1985	1986	1987	1988	1989	1990	1991	1992	1993	1994	1995	1996	1997	1998	1999	2000	2001	2002	2003	2004	2005	2006	2007	2008	2009	2010	2011	2012	2013	2014	2015
CO2e	1	0.977044	0.928584	0.987914	0.996886	0.990449	1.01546	1.08716	1.1386	1.0899	1.07358	1.11511	1.12096	1.16026	1.18338	1.20511	1.2569	1.27895	1.30125	1.35461	1.34326	1.36302	1.41231	1.38489	1.37783	1.38247	1.41275	1.37415	1.29907	1.30518	1.30003	1.30681	1.33847	1.34299	1.32716
Population	1	1.01197	1.02202	1.03171	1.04118	1.05159	1.06554	1.07945	1.09899	1.11568	1.12963	1.14308	1.15572	1.16844	1.1806	1.193	1.20492	1.21496	1.22487	1.23634	1.24983	1.26344	1.27485	1.28679	1.29905	1.31227	1.32506	1.33948	1.3549	1.37008	1.38368	1.40011	1.4163	1.43173	1.4437
GDP/capita	1	0.966612	0.97991	1.01861	1.05782	1.07659	1.09992	1.13111	1.13595	1.12665	1.09802	1.09319	1.10895	1.14616	1.16296	1.1659	1.20033	1.23562	1.29259	1.34611	1.35446	1.37528	1.39122	1.423	1.45371	1.4793	1.49861	1.49394	1.43079	1.46615	1.49872	1.5088	1.52892	1.55598	1.55686
E/GDP	1	1.00296	0.94723	0.962592	0.950216	0.943623	0.928407	0.947934	0.957558	0.923384	0.931176	0.94262	0.943438	0.942954	0.920312	0.918638	0.899569	0.862547	0.83655	0.821363	0.800514	0.802925	0.814491	0.789513	0.762944	0.753387	0.751033	0.738959	0.727539	0.704063	0.685922	0.675229	0.673618	0.665148	0.65873
GHG/E	1	0.99589	0.97886	0.976588	0.952539	0.927129	0.933242	0.939315	0.952479	0.939025	0.929517	0.946686	0.927071	0.918784	0.936534	0.943148	0.966075	0.987699	0.98246	0.990972	0.991231	0.976974	0.977665	0.957948	0.956308	0.945277	0.947289	0.929276	0.921067	0.922861	0.913953	0.916158	0.917605	0.906339	0.896377
Normalized to 1995	1981	1982	1983	1984	1985	1986	1987	1988	1989	1990	1991	1992	1993	1994	1995	1996	1997	1998	1999	2000	2001	2002	2003	2004	2005	2006	2007	2008	2009	2010	2011	2012	2013	2014	2015
Population	0.847029	0.857166	0.865681	0.873892	0.881914	0.890724	0.902543	0.914322	0.930875	0.945015	0.956833	0.968226	0.978925	0.989706	1	1.01051	1.0206	1.02911	1.0375	1.04721	1.05864	1.07017	1.07983	1.08995	1.10034	1.11153	1.12237	1.13458	1.14764	1.1605	1.17202	1.18593	1.19964	1.21271	1.22286
GDP/capita	0.859876	0.831166	0.842601	0.875875	0.909596	0.92573	0.945797	0.972615	0.976775	0.968775	0.944159	0.940012	0.953562	0.985556	1	1.00253	1.03213	1.06248	1.11147	1.15749	1.16466	1.18257	1.19628	1.22361	1.25001	1.27201	1.28862	1.2846	1.2303	1.2607	1.28871	1.29738	1.31468	1.33795	1.33871
E/GDP	1.08659	1.08981	1.02925	1.04594	1.03249	1.02533	1.0088	1.03001	1.04047	1.00334	1.0118	1.02424	1.02513	1.0246	1	0.998181	0.977461	0.937233	0.908985	0.892483	0.869829	0.872449	0.885016	0.857876	0.829006	0.818621	0.816064	0.802944	0.790535	0.765026	0.745315	0.733696	0.731946	0.722741	0.715768
GHG/E	1.06777	1.06338	1.04519	1.04277	1.01709	0.989958	0.996485	1.00297	1.01703	1.00266	0.992507	1.01084	0.989895	0.981048	1	1.00706	1.03154	1.05463	1.04904	1.05813	1.0584	1.04318	1.04392	1.02287	1.02111	1.00934	1.01148	0.992251	0.983485	0.985401	0.975889	0.978243	0.979788	0.967759	0.957122
	1981	1982	1983	1984	1985	1986	1987	1988	1989	1990	1991	1992	1993	1994	1995	1996	1997	1998	1999	2000	2001	2002	2003	2004	2005	2006	2007	2008	2009	2010	2011	2012	2013	2014	2015
GDP	1	0.97818	1.00149	1.05091	1.10139	1.13212	1.17201	1.22097	1.24839	1.25698	1.24036	1.24961	1.28163	1.33922	1.37298	1.39093	1.44629	1.50122	1.58326	1.66424	1.69283	1.73758	1.77359	1.8311	1.88845	1.94124	1.98575	2.0011	1.93858	2.00874	2.07374	2.11248	2.1654	2.22774	2.24764
Energy	1	0.981076	0.948638	1.0116	1.04656	1.0683	1.0881	1.1574	1.19541	1.16067	1.15499	1.17791	1.20914	1.26283	1.26357	1.27776	1.30104	1.29488	1.32448	1.36695	1.35514	1.39515	1.44457	1.44568	1.44078	1.46251	1.49136	1.47873	1.41039	1.41428	1.42243	1.42641	1.45865	1.48177	1.48058
Primary energy intensity	12.2017	12.2378	11.5578	11.7452	11.5942	11.5138	11.3281	11.5664	11.6838	11.2668	11.3619	11.5016	11.5115	11.5056	11.2294	11.2089	10.9763	10.5245	10.2073	10.022	9.76762	9.79704	9.93815	9.63339	9.3092	9.19259	9.16387	9.01655	8.8772	8.59075	8.36941	8.23893	8.21928	8.11592	8.03761
															1	0.998181	0.977461	0.937233	0.908985	0.892483	0.869829	0.872449	0.885016	0.857876	0.829006	0.818621	0.816064	0.802944	0.790535	0.765026	0.745315	0.733696	0.731946	0.722741	0.715768
															0	0.00181923	0.0225391	0.0627666	0.091015	0.107517	0.130171	0.127551	0.114984	0.142124	0.170994	0.181379	0.183936	0.197056	0.209465	0.234974	0.254685	0.266304	0.268054	0.277259	0.284232

## Sheet: Figure 2 Data
FIG 2 DATA	Total	Sector Composition of GDP	Productivity (GDP/capita)	Sector Energy Intensities	Per Capita Personal Energy
Total	-2.63857	-1.26968	-0.62052	-0.583323	-0.165078
DATA FOR FIGURE 1-3
	Oil and Gas	Electricity Generation	Energy Intensive Industry	Freight Transportation	Other Industry	Commercial and Institutional	TOTAL GDP
1995 GDP	49.6954	24.1601	29.7586	0	193.588	552.752	849.954
2010 GDP	54.15	26.946	28.9784	0	231.758	839.48	1181.31
	Oil and Gas	Electricity Generation	Energy Intensive Industry	Freight Transportation	Other Industry	Commercial and Institutional
1995 Intensity	28.0764	66.8548	51.0637	21.1733	4.51866	1.85406
2010 Intensity	35.7075	61.3636	45.2652	20.864	3.44486	1.25266

## Sheet: Fig 3 Data
DATA FOR FIGURE 3, OIL AND GAS SECTOR INTENSITY FACTORIZATION
Oil and Gas Industry
	Total	Industry Composition	Δ(E/GDP) of Segments		Extraction Δ(E/GDP)	Δ(Eo/GDP)	Δ(E/Eo)	Pipelines Δ(E/GDP)	Δ(Eo/GDP)	Δ(E/Eo)	Refineries Δ(E/GDP)	Δ(Eo/GDP)	Δ(E/Eo)
Impact on total Δ(E/GDP)	0.403488	0.0140433	0.389445		0.589501	0.00924077	0.58026	-0.127642	0.0287329	-0.156375	-0.0724136	-1.29719e-06	-0.0724123
Actual Δ(E/GDP) (within sector)	7.6311	0.265598	7.36551		11.1491	0.174769	10.9744	-2.41408	0.543421	-2.9575	-1.36955	-2.45335e-05	-1.36952
	Δ(E/GDP) of Segments	Extraction Δ(E/GDP)	Pipelines Δ(E/GDP)	Refineries Δ(E/GDP)
Impact on total Δ(E/GDP)	0.389445	0.589501	-0.127642	-0.0724136
Actual ΔE/GDP (within sector)	7.36551	11.1491	-2.41408	-1.36955
									Chart Size: 5.13		Range: 1.40		2.19857
	Extraction Δ(E/GDP)	Δ(Eo/GDP)	Δ(E/Eo)				Scale calc:	-3.81197
Impact on total Δ(E/GDP)	0.589501	0.00924077	0.58026
Actual ΔE/GDP (within sector)	11.1491	0.174769	10.9744
										2.565
	Pipelines Δ(E/GDP)	Δ(Eo/GDP)	Δ(E/Eo)
Impact on total Δ(E/GDP)	-0.127642	0.0287329	-0.156375
Actual ΔE/GDP (within sector)	-2.41408	0.543421	-2.9575
	Refineries Δ(E/GDP)	Δ(Eo/GDP)	Δ(E/Eo)
Impact on total Δ(E/GDP)	-0.0724136	-1.29719e-06	-0.0724123
Actual Δ(E/GDP) (within sector)	-1.36955	-2.45335e-05	-1.36952
OIL AND GAS STRUCTURE VS EFFICIENCY								OIL AND GAS SECTORS CHANGES
EXTRACTION
PIPELINES
REFINERIES

## Sheet: Fig 4 Data
DATA FOR FIGURE 4. ELECTRIC POWER FACTORIZATION
	Total	Δ(Eo/GDP)	Δ(E/Eo)
Impact on total Δ(E/GDP)	-0.135026	-0.0764259	-0.0585998
Actual Δ(E/GDP) (within sector)	-5.49127	-3.10811	-2.38315
	Δ(E/Eo)	Change in generation mix	Net efficiency
Impact on total Δ(E/GDP)	-0.0585998	-0.0611279	0.00252811							0.406683
Actual Δ(E/GDP) (within sector)	-2.38315	-2.48597	0.102814

## Sheet: Fig 5 Data
Data for Figure 5. Energy Intensive Industry Factorization
	Total	Industry composition	Δ(E/GDP) of Segments	Pulp & Paper	Smelting & Refining	Cement	Chemicals	Mining
Impact on total Δ(E/GDP)	-0.18517	0.00710226	-0.192272	-0.131319	-0.100119	-0.0189488	-0.0340178	0.0921317
Actual Δ(E/GDP) (within sector)	-5.79847	0.222402	-6.02087	-4.11215	-3.13515	-0.593366	-1.06524	2.88504

## Sheet: Fig 6 Data
Data for Figure 6. Commercial and Institutional Buildings Factorization
	Total	Δ(Floor area/GDP)	Δ(E/floor area)	ΔBuilding mix	Δ(E/floor area) by building type
Impact on total Δ(E/GDP)	-0.411564	-0.244946	-0.166618	0.00678837	-0.173406
Actual Δ(E/GDP) (within sector)	-0.601404	-0.357931	-0.243473	0.00991961	-0.253393

## Sheet: Fig 7 Data
DATA FOR FIGURE 7. FREIGHT SECTOR FACTORIZATION
	Total	Δ(TKT/GDP)	Δ(E/TKT)	ΔMode share	Δ(E/TKT) by mode
Impact on total Δ(E/GDP)	-0.0136041	-0.0724343	0.0588302	0.196833	-0.138003
Actual ΔE/GDP (within sector)	-0.309316	-1.64694	1.33762	4.47539	-3.13777
	Total	Δ(TKT/GDP)	Δ(E/TKT)	ΔMode share	Δ(E/TKT) by mode
Global	-0.0136041
TKT/GDP change:		-0.0724343
Impact of E/tkt change:			0.0588302
E/tkt sub				0.196833	-0.138003

## Sheet: Fig 8 and 9 Data
DATA FOR FIGURES 8 and 9, HOUSEHOLD SECTOR FACTORIZATIONS
Total	Smaller households	Energy per household	Housing Mix	Larger dwellings	Energy/floor area		Total	PKT/capita	Energy/pkt	Mode share	Energy/pkt
-0.200767	0.0637131	-0.26448	0.00398804	0.0704233	-0.338892		0.0356894	0.152693	-0.117003	0.0656673	-0.182671

## Sheet: Fig 10 and 11 Data
DATA COMPILIATION FOR FIGURES 10 and 11. CONSOLIDATION OF RESULTS
How to Use this Spreadsheet												s	s	s	e	e	s	s
1. named range importeddata receives most recent data from Summary II tab, in blue area												OG-Extraction: Product mix	FT: Mode Share	PT: PKT/capita	OG-Extraction: E/Eo	EII Mining: E/GDP	Res: Floor area/dwelling	PT: Mode share	Res: People/household	OG-Pipeline: Eo/GDP	OG: Industry composition	OG-Extraction: Eo/GDP	EII: Industry composition	CI: Building type share	Res: Dwelling type share	PG: E/Eo by type	OG-Refinery: Eo/GDP	OG-Pipeline: product mix	EII-Cement: E/GDP	EII-Chemical: E/GDP	PG: Generation mix	OG-Refinery: E/Eo	FT: TKT/GDP	PG: Eo/GDP	EII-Smelting: E/GDP	EII-Pulp+Paper: E/GDP	FT: E/TKT by mode	OG-Pipeline: E/Eo by product	CI: E/floor area by building type	PT: E/PKT by mode	MOI: E/GDP	CI: Floor area/GDP	Res: E/floor area
2. the orange area is an analysis of which of incoming factors are unique (to avoid double counting)												0.481232	0.196833	0.152693	0.0990285	0.0921317	0.0704233	0.0656673	0.0637131	0.0287329	0.0140433	0.00924077	0.00710226	0.00678837	0.00398804	0.00252811	-1.29719e-06	-0.014593	-0.0189488	-0.0340178	-0.0611279	-0.0724123	-0.0724343	-0.0764259	-0.100119	-0.131319	-0.138003	-0.141782	-0.173406	-0.182671	-0.241447	-0.244946	-0.338892	-0.748401
3. The yellow area is then a copy of the combined blue/orange area, values only											Unclassified					0.0921317													-0.0189488	-0.0340178					-0.100119	-0.131319					-0.241447			-0.43372				-0.43372
4. The unique fields can then be sorted to the top and sorted in the green area											Structure	0.481232	0.196833	0.152693			0.0704233	0.0656673	0.0637131		0.0140433		0.00710226	0.00678837	0.00398804		-1.29719e-06	-0.014593			-0.0611279		-0.0724343									-0.244946		0.669381
											EI				0.0990285					0.0287329		0.00924077				0.00252811						-0.0724123		-0.0764259			-0.138003	-0.141782	-0.173406	-0.182671			-0.338892	-0.984061				-0.984061
Transpose columns O and N to the horizontal range from which the graph draws its labels and numbers, starting at or around M3
																																													MJ/$
Imported Data Named Range in Blue:	-1.26968		Business Sector Composition	Structure A						Unique																														Business Sector Shares in GDP					-1.26968	Structural	-1.8902	-1.22082
	-0.62052	Names for graph	Productivity Impact	Structure B																																				Productivity Change (GDP/capita)					-0.62052	Change
From the Main Sheet:					Unique
	0.403488		O&G Total			UNSORTED							PASTED VALUES FOR SORTING																											Business Sector Energy Intensity (Change in Energy/value added for Business Sectors)					-0.583323
Oil and Gas Industry (E/GDP) Change, MJ/$	0.0140433	O&G industry composition	O&G Industry Composition	Structure C	Yes	Industry Composition (production vs. refining vs. pipelines)	0.0140433	O&G industry composition	O&G Industry Composition	Structure C	Yes		0.481232	O&G extraction product mix	Structure		0.58026																							Household Efficiency (Change in per capita energy use by household sector)					-0.165078
Industry Composition (production vs. refining vs. pipelines)	0.389445		O&G EI of Segments	EI		of which impact of PJO/GDP	0.00924077	O&G extraction Eo/GDP	O&G Extraction Production/GDP	Structure C	Yes		0.196833	Freight transport mode share	Structure		0.448374
Energy/GDP of Segments	0.589501		O&G Extraction EI	EI		of which impact in product mix change	0.481232	O&G extraction product mix	O&G extraction product mix	Structure C	Yes		0.152693	Personal transport PKT/capita	Structure		1.06248																												-2.6386			-2.6386
Change of Energy/GDP for extraction segment	0.00924077	O&G extraction Eo/GDP	O&G Extraction Production/GDP	Structure C	Yes	impact of change in product energy/out ratios	0.0990285	O&G extraction E/Eo	O&G extraction EI	EI	Yes		0.0990285	O&G extraction E/Eo	EI		0.820993
of which impact of PJO/GDP	0.58026		O&G extraction EI	EI		of which energy carried/GDP	0.0287329	O&G pipeline Eo/GDP	O&G pipeline activity/GDP	Structure C	Yes		0.0921317	Mining E/GDP	EI	og	0.632276
change in energy/unit production for segment	0.481232	O&G extraction product mix	O&G extraction product mix	Structure C	Yes	of which product mix (gas takes more energy to move)	-0.014593	O&G pipeline product mix	O&G pipeline product mix	Structure C	Yes		0.0704233	Residential floor area per dwelling	Structure		0.488567
of which impact in product mix change	0.0990285	O&G extraction E/Eo	O&G extraction EI	EI	Yes	energy intensity of pipeline operations	-0.141782	O&G pipeline E/Eo by product	O&G pipeline EI	ei	Yes		0.0656673	Personal transport mode share	Structure
impact of change in product energy/out ratios	-0.127642		O&G pipeline E/GDP	Stucture C		of which change in refinery output per GDP	-1.29719e-06	O&G refinery Eo/GDP	O&G refinery production per GDP	Structure C	Yes		0.0637131	Residential household size (people/HH)	Structure
Change in energy/GDP of Pipeline segment	0.0287329	O&G pipeline Eo/GDP	O&G pipeline activity/GDP	Structure C	Yes	change in energy use per unit of CO refined	-0.0724123	O&G refinery E/Eo	O&G refinergy EI	EI	Yes		0.0287329	O&G pipeline Eo/GDP	EI
of which energy carried/GDP	-0.156375		O&G pipeline EI	EI		Eproduced/GDP	-0.0764259	Power generation Eo/GDP	Power Generation per GDP	Structure C	Yes		0.0140433	O&G industry composition	Structure
and energy use per unit of energy carried	-0.014593	O&G pipeline product mix	O&G pipeline product mix	Structure C	Yes	of which generation mix:	-0.0611279	Power generation mix	Power Generation Mix	Structure C	Yes		0.00924077	O&G extraction Eo/GDP	EI
of which product mix (gas takes more energy to move)	-0.141782	O&G pipeline E/Eo by product	O&G pipeline EI	ei	Yes	and net production eff	0.00252811	Power generation E/Eo by type	Power Generation EI	EI	Yes		0.00710226	Energy intensive industry composition	Structure
energy intensity of pipeline operations	-0.0724136		O&G refinery E/GDP	Structure C		Industry composition	0.00710226	Energy intensive industry composition	EEI Industry Mix	Structure C	Yes		0.00678837	C&I building type share	Structure
Change in energy/GDP of Refinery segment	-1.29719e-06	O&G refinery Eo/GDP	O&G refinery production per GDP	Structure C	Yes	Delta Energy/GDP of Pulp and Paper Segment	-0.131319	Pulp & paper E/GDP	Pulp & Paper EI	EI	Yes		0.00398804	Residential dwelling type share	Structure
of which change in refinery output per GDP	-0.0724123	O&G refinery E/Eo	O&G refinergy EI	EI	Yes	Energy/GDP of Smelting and Refining, incl Steel	-0.100119	Smelting E/GDP	Smeling EI	EI	Yes		0.00252811	Power generation E/Eo by type	EI
change in energy use per unit of CO refined	0					Energy/GDP of Cement	-0.0189488	Cement E/GDP	Cement EI	EI	Yes		-1.29719e-06	O&G refinery Eo/GDP	EI		1.29414
0	-0.135026		Power Generation E/GDP	ei		Energy/GDP of Chemicals	-0.0340178	Chemicals E/GDP	Chemicals EI	EI	Yes		-0.014593	O&G pipeline product mix	Structure	0.0071445
Electricity Generation	-0.0764259	Power generation Eo/GDP	Power Generation per GDP	Structure C	Yes	Energy/GDP of Mining	0.0921317	Mining E/GDP	Mining EI	EI	Yes		-0.0189488	Cement E/GDP	EI	0.00927704
Eproduced/GDP	-0.0585998		Power Generation EI	EI		Other Industry (no factorization)	-0.241447	Other industry E/GDP	General industry EI	EI	Yes		-0.0340178	Chemicals E/GDP	EI	0.0166546
Esector/Eproduced	-0.0611279	Power generation mix	Power Generation Mix	Structure C	Yes	Floor area/GDP	-0.244946	C&I floor area/GDP	C&I floor area/GDP	Structure C	Yes		-0.0611279	Power generation mix	Structure	0.0299273
of which generation mix:	0.00252811	Power generation E/Eo by type	Power Generation EI	EI	Yes	of which building mix	0.00678837	C&I building type share	C&I building mix	Structure C	Yes		-0.0724123	O&G refinery E/Eo	EI	0.035452
and net production eff	0					energy/floor area by building type	-0.173406	C&I E/floor area by building type	C&I energy/floor area	EI	Yes		-0.0724343	Freight transport TKT/GDP	Structure	0.0354628
0	-0.18517		EEI E/GDP	EI		TKT/GDP change:	-0.0724343	Freight transport TKT/GDP	Freight tkt/GDP	Structure C	Yes		-0.0764259	Power generation Eo/GDP	EI	0.037417
Energy Intensive Industry	0.00710226	Energy intensive industry composition	EEI Industry Mix	Structure C	Yes	of which mode shift impact:	0.196833	Freight transport mode share	Freigt mode share	Structure C	Yes		-0.100119	Smelting E/GDP	EI	0.0490167
Industry composition	-0.192272		EEI E/GDP of Segments	EI		and vehicle efficiency impact:	-0.138003	Freight transport E/TKT by mode	Freight energy per tkt	EI	Yes		-0.131319	Pulp & paper E/GDP	EI	0.0642918	-0.512298
Energy/GDP of Segments	-0.131319	Pulp & paper E/GDP	Pulp & Paper EI	EI	Yes	Households per person	0.0637131	Residential household size (people/HH)	Residential household size	Structure C	Yes		-0.138003	Freight transport E/TKT by mode	EI	0.0675641
Delta Energy/GDP of Pulp and Paper Segment	0					Dwelling type share	0.00398804	Residential dwelling type share	Residential housing mix	Structure C	Yes		-0.141782	O&G pipeline E/Eo by product	EI	0.0694146
tonnes of production/GDP	0					Floor area per dwelling type	0.0704233	Residential floor area per dwelling	Residential dwelling size	Structure C	Yes		-0.173406	C&I E/floor area by building type	EI	0.0848973
energy use per tonne of production	-0.100119	Smelting E/GDP	Smeling EI	EI	Yes	Energy use/floor area by dwelling type	-0.338892	Residential E/floor area	Residential energy/floor area	EI	Yes		-0.182671	Personal transport E/PKT by mode	EI	0.0894329
Energy/GDP of Smelting and Refining, incl Steel	0					PKT/capita	0.152693	Personal transport PKT/capita	Personal transport pkt/capita	Structure C	Yes		-0.241447	Other industry E/GDP	EI	0.118209
tonnes of production/GDP	0					Mode share	0.0656673	Personal transport mode share	Personal transport mode share	Structure C	Yes		-0.244946	C&I floor area/GDP	Structure	0.119922	0.192457
energy use per tonne of production	-0.0189488	Cement E/GDP	Cement EI	EI	Yes	Energy/pkt by mode	-0.182671	Personal transport E/PKT by mode	Personal transport energy/pkt	EI	Yes		-0.338892	Residential E/floor area	EI	0.165916	-2.04254
Energy/GDP of Cement	0
tonnes of production/GDP	0												0.298854	Productive Economy Structure			-0.521562
energ use per tonne of production	-0.0340178	Chemicals E/GDP	Chemicals EI	EI	Yes								-0.89622	Productive Economy Intensity			0.255349
Energy/GDP of Chemicals	0												0.356484	Household Structure
tonnes of production/GDP	0												-0.521562	Household Intensity
energy use per tonne of production	0.0921317	Mining E/GDP	Mining EI	EI	Yes								-0.762444
Energy/GDP of Mining	0
tonnes of production/GDP	0
energy use per tonne of production	0
0	-0.241447	Other industry E/GDP	General industry EI	EI	Yes	0
Other Industry (no factorization)	0					0
0	-0.411564		C&I E/GDP	EI		0
Commercial and Institutional Buildnigs	-0.244946	C&I floor area/GDP	C&I floor area/GDP	Structure C	Yes	0
Floor area/GDP	-0.166618		C&I energy/floor area	EI		0
Energy/floor area	0.00678837	C&I building type share	C&I building mix	Structure C	Yes	0
of which building mix	-0.173406	C&I E/floor area by building type	C&I energy/floor area	EI	Yes	0
energy/floor area by building type	0					0
of which efficiency	0					0
service intensity	0					0
weather	0					0
0	-0.0136041		Freight E/GDP	EI		0
Freight E/GDP	-0.0724343	Freight transport TKT/GDP	Freight tkt/GDP	Structure C	Yes	0
TKT/GDP change:	0.0588302		Freight E/tkt	EI		0
Impact of E/tkt change:	0.196833	Freight transport mode share	Freigt mode share	Structure C	Yes	0
of which mode shift impact:	-0.138003	Freight transport E/TKT by mode	Freight energy per tkt	EI	Yes	0
and vehicle efficiency impact:	0					0
0	0					0
0	0					0
0	-0.165078					0
Total Impact on Global MJ/2002$ of Change in E/capita in the household sector:	Impact on Global E/GDP change (MJ/2002$)			EI		0
0	-0.165078					-0.0170231	Freight E/GDP		EI
Combined Residential and Personal Transport	-0.200767		Residential energy per capita	EI		-0.0295707	O&G refinery E/GDP		Structure C
RESIDENTIAL ENERGY PER CAPITA	0.0637131	Residential household size (people/HH)	Residential household size	Structure C	Yes	-0.0312724	Power Generation E/GDP		ei
Households per person	-0.26448		Residential energy per household	EI		-0.0903367	O&G pipeline E/GDP		Stucture C
Energy use per household	0.00398804	Residential dwelling type share	Residential housing mix	Structure C	Yes	-0.0928569	Personal transport energy/pkt		EI
Dwelling type share	0.0704233	Residential floor area per dwelling	Residential dwelling size	Structure C	Yes	-0.0999216	O&G pipeline EI		EI
Floor area per dwelling type	-0.338892	Residential E/floor area	Residential energy/floor area	EI	Yes	-0.159421	EEI E/GDP of Segments		EI
Energy use/floor area by dwelling type	0					-0.196091	C&I energy/floor area		EI
Weather	0					-0.198267	EEI E/GDP		EI
Service intensity	0					-0.227105
Energy efficiency	0					-0.227105
0	0.0356894		Personal transport energy per capita	EI		-0.241325	Residential energy per capita		EI
PERSONAL MOBILITY PER CAPITA	0.152693	Personal transport PKT/capita	Personal transport pkt/capita	Structure C	Yes	-0.302887	Residential energy per household		EI
PKT/capita	-0.117003		Personal transport energy/pkt	EI		-0.411936	C&I E/GDP		EI
Energy/PKT	0.0656673	Personal transport mode share	Personal transport mode share	Structure C	Yes	-0.521844	Productivity Impact		Structure B
Mode share	-0.182671	Personal transport E/PKT by mode	Personal transport energy/pkt	EI	Yes	-0.719324
Energy/pkt by mode	-0.748401					-0.719324
Sum of Unique Factors	-0.748401					-1.13711	Business Sector Composition		Structure A
Should agree with
							Energy Intensity (mostly efficiency)		-1.37933	0.52275
							Structure		-1.25927	0.47725
							Structure A - Business Sector Mix		-1.26968	0.481195
							Structure B - Productivity		-0.62052	0.23517
							Structure C Intrasectoral		0.630929	-0.239115
									-2.6386
					-0.748401		Apparent EI if Str C not factored		-0.748401	0.283635
							Apparent Structure if C not incl		-1.8902	0.716365
							Total		-2.6386

[truncated: 29 more sheets: SUMMARY RESULTS, Summary Results Table, FGDPCOMP, SECTOR FACTORIZATION -->, FEII, PADEII, PADOTHI, FOILGAS, PADOILGAS, FELECGEN, PADELECGEN, FCOMMINT, PADCOMMINT, FFREIGHT, PADFREIGHT, FRES, PADRES, FMOB, PADMOB, 1-4 Sector Breakdown …]
